# Supplementary material
Source: PubMed Central journal article supplement (PMC4116430)
Supplement: NIHMS570276-supplement-supporting_info.pdf [file NIHMS570276-supplement-supporting_info.pdf]

## Supplementary Materials

### Table of contents:

|                                                                                                                                |    |
|--------------------------------------------------------------------------------------------------------------------------------|----|
| <b>Materials and Methods</b>                                                                                                   | 2  |
| <b>Table S1.</b> Conversion and degradation of D-1 and L-1.                                                                    | 5  |
| <b>Figure S1.</b> Formation of the hydrogel of D-1 in HeLa cell conditioned medium.                                            | 6  |
| <b>Figure S2.</b> High gradient of phosphatases in pericellular space is essential for the formation of pericellular hydrogel. | 6  |
| <b>Figure S3.</b> SEM images of freeze dried HeLa cells treated with D-1 at 280 $\mu$ M for 2h.                                | 6  |
| <b>Figure S4.</b> TEM image of hydrogel formed by ALP induced enzymatic gelation of D-1 in PBS buffer.                         | 7  |
| <b>Figure S5.</b> Optical image of Ect1/E6E7 cells incubated with D-1 at 560 $\mu$ M for 48h.                                  | 7  |
| <b>Figure S6.</b> Amount of phosphatases in the conditioned media of HeLa, Ect1/E6E7, MES-SA and MES-SA/Dx5 cells.             | 7  |
| <b>Figure S7.</b> Inhibitory effect of D-1 to HeLa cells.                                                                      | 8  |
| <b>Figure S8.</b> Overlaid images and 3D stacked z-scan images of Congo red and DAPI stained MES-SA and MES-SA/Dx5.            | 8  |
| <b>Figure S9.</b> Distribution of D-2 around the cells.                                                                        | 9  |
| <b>Figure S10.</b> Chemical structures of L-1 and L-2, the enantiomers of D-1 and D-2.                                         | 9  |
| <b>Figure S11.</b> Formation of pericellular hydrogel/nanofibrils is dependent to the bio-stability of the molecules.          | 9  |
| <b>Figure S12.</b> 48 h cytotoxicity of HeLa cells with removal of pericellular hydrogel/nanonets at 4 h.                      | 10 |
| <b>Figure S13.</b> $^1\text{H}$ NMR of L-1 and D-1.                                                                            | 10 |

### Movies:

- Movie S1.** 3D construction for the z-stack confocal images of DAPI and Congo red stained HeLa cells.
- Movie S2.** 3D construction for the z-stack confocal images of DAPI and Congo red stained HeLa cells treated by D-1 at 280  $\mu$ M for 2h.
- Movie S3.** 3D construction for the z-stack confocal images of DAPI and Congo red stained Ect1/E6E7 cells.
- Movie S4.** 3D construction for the z-stack confocal images of DAPI and Congo red stained Ect1/E6E7 cells treated by D-1 at 560  $\mu$ M for 2h.

## Materials and Methods

*Cell culture:* All cell lines were purchased from the American Type Culture Collection (ATCC, Manassas, VA, USA). The HeLa cells were propagated in MEM supplemented with 10% fetal bovine serum (FBS) and antibiotics in a fully humidified incubator containing 5% CO<sub>2</sub> at 37°C. The Ect1/E6E7 cells were propagated in Keratinocyte-Serum Free medium supplemented with 0.1 ng/ml human recombinant EGF, 0.05 mg/ml bovine pituitary extract, and additional calcium chloride 44.1 mg/L in a fully humidified incubator containing 5% CO<sub>2</sub> at 37°C. The MES-SA cells were propagated in McCoy's 5A supplemented with 10% fetal bovine serum (FBS) and antibiotics in a fully humidified incubator containing 5% CO<sub>2</sub> at 37°C. The MES-SA/dx5 cells were propagated in McCoy's 5A supplemented with 10% fetal bovine serum (FBS), antibiotics and 10 nM taxol in a fully humidified incubator containing 5% CO<sub>2</sub> at 37°C.

*Pericellular hydrogelation:* Dissolve D-1 at 8.09 mg/mL in ddH<sub>2</sub>O to get stock solution of 11.2 mM, adjust pH to 7.4 by 1N NaOH.  $2 \times 10^5$  of the cells in exponential growth phase were seeded in 35mm Petri dish with 1 mL complete culture medium. After overnight incubation, the medium was replaced by 1 mL of medium containing D-1 (diluted from the stock solution immediately before use). After incubation at 37°C for 2 h, the Petri dishes were taken out from incubator and tilted on bench to visualize the pericellular hydrogel. In the co-incubation of phosphatase inhibitors, the cells were first washed with medium containing Pierce phosphatases inhibitor cocktail (Thermo) (contains sodium fluoride, sodium orthovanadate, sodium pyrophosphate and beta-glycerophosphate) for 3 time. Then 1 mL of medium containing both the inhibitor cocktail and D-1 was applied to cells.

*Conditioned medium:*  $2 \times 10^5$  of cells in exponential growth phase were seeded in 35mm Petri dish with 1 mL complete culture medium. After overnight incubation, 1 mL of new medium was replaced and incubated for 24h at 5% CO<sub>2</sub>, 37°C. The medium is removed and centrifuged at 10,000 rpm for 5 min. The suspension were placed into a 1.5mL eppendorf tube and stocked at -20°C in aliquot. The stock conditioned medium was thawed and warm to 37°C in water bath immediately before use.

*TEM:* Carbon coated copper grids were glow-discharged to increase their hydrophilicity before use. After obtain pericellular hydrogel/nanofibrils by incubating D-1 at 280  $\mu$ M with HeLa cells for 2 h, the medium was removed to expose the pericellular hydrogel. The carbon coated side of the grid was gently pressed onto the pericellular hydrogel for 1s, and then the sample-loaded surface was washed by touching a drop of ddH<sub>2</sub>O. The edge of the grid was immediately leaned to touch a filter paper for three times to remove water from the grid. The grid was stained by letting the grid touch a drop of 2.0 % (w/v) uranyl acetate with the sample-loaded surface. Excessive stain solution was removed by gently touching the grid with a drop of ddH<sub>2</sub>O then dried by touching the edge of the grid with a filter paper for 3 times. The grid was air dried for a few minutes and was then examined immediately.

*SEM:* Cells in exponential growth phase were seeded in glass bottomed 35 mm Petri dish at  $2 \times 10^4$  cell/well. The cells were allowed for attachment for 24 h at 37 °C, 5% CO<sub>2</sub>. The culture medium was removed, and new culture medium containing D-1 was added. After 12 h of incubation, cells were washed with PBS buffer for 3 times and the solution was removed by touch a filter paper to the edge of the dish. Holding the edge of the plastic dish by a long tweezers, the dish was immersed into liquid N<sub>2</sub> for 5s (the glass crack during the freezing) and quickly transferred into a freeze dryer. After drying overnight, the dish was removed from the freeze dryer. The glass bottom was carefully detached from the dish by tweezers, and placed in a sputter coater for coating of gold (2 nm thick). The coated glass was imaged immediately.

*Confocal microscopy:* Cells in exponential growth phase were seeded in glass bottomed culture chamber at  $2 \times 10^4$  cell/well. The cells were allowed for attachment for 24 h at 37 °C, 5% CO<sub>2</sub>. The culture medium was removed, and new culture medium containing D-1 at 280 µM was added. After 12 h of incubation, cells were washed with PBS buffer for 3 times and stained with 0.1 mg / mL Congo red and 0.6 µM DAPI in PBS buffer for 30 min at 37 °C in dark. The cells were rinsed three times in PBS, and then kept in the PBS buffer for imaging.

*Cell migration assay:* Cell migration was evaluated by the wound healing assay using the CytoSelect Wound Healing Assay Kit (Cell Biolabs). Wound healing inserts with width at 0.9 mm were put into 24-well plates. 0.8 mL of HeLa cells at  $2 \times 10^5$  cell/mL were added to either side of the insert and incubated overnight to form a confluent layer. Then the inserts were carefully removed to expose the gap. After removing the culture medium, new medium containing the molecules were added to cells. Then the cells were incubated at 37 °C, 5% CO<sub>2</sub> for 18 h. Images of gap before and after addition of the molecules were captured using a microscope at a magnification of  $\times 40$ . Cell migration was quantified by measuring the change of gap distance.

*Cell adhesion assay:* Cells in exponential growth phase were detached by 0.25% trypsin –EDTA. After neutralizing trypsin by addition of complete culture medium, the cells were collected by centrifuge (1000 rpm, 3 min). The cell pellet was suspended by addition of culture medium to a concentration of  $4 \times 10^5$  cell/mL. 1 mL of the cell suspension was mixed with 1 mL of 2X D-1 or D-2 containing culture media. The resulting solutions were added into 96 well plate at 100 µL/well. After desired time of incubation at 37 °C, 5% CO<sub>2</sub>, the solution was gently removed, 100 µL of culture medium and 10 µL of 5 mg/mL MTT were added to each well. After incubate at dark for 4 h, 100 µL of 10% SDS with 0.01M HCl was added to each well to stop the reduction reaction and to dissolve the purple. After incubation of the cells at 37 °C for overnight, the viability is measured. Data represent the mean  $\pm$  standard deviation of three independent experiments.

*Phosphatase activity assay:* Phosphatase activity was evaluated by the alkaline phosphatase assay using the alkaline phosphatase assay kit (Abcam) following the supplied protocol. In brief, 50 µL of 5 mM pNPP solution in assay buffer was mixed with 80 µL of the sample solutions in 96 well plate. The mixed solution was incubated at 25 °C, protect from light. 20 µL of stop solution was added to each test and the OD at 405 nm of the solution was measured in a microplate reader.

*Cell viability assay:* Cells in exponential growth phase were seeded in a 96 well plate at a concentration of  $2 \times 10^4$  cell/well. The cells were allowed to attach to the wells for 24 h at 37 °C, 5% CO<sub>2</sub>. The culture medium was removed and 100 µL culture medium containing compounds (immediately diluted from fresh prepared stock solution of 10 mM) at gradient concentrations (0 µM as the control) was placed into each well. After culturing at 37 °C, 5% CO<sub>2</sub> for 48 h, each well was added by 10 µL of 5 mg/mL MTT ((3-(4, 5-Dimethylthiazol-2-yl)-2, 5-diphenyltetrazolium bromide), and the plated cells were incubate at dark for 4 h. 100 µL 10% SDS with 0.01M HCl was added to each well to stop the reduction reaction and to dissolve the purple. After incubation of the cells at 37 °C for overnight, the OD at 595 nm of the solution was measured in a microplate reader. Data represent the mean  $\pm$  standard deviation of three independent experiments.

*Apoptosis pathway assay:* The apoptosis pathway was evaluated by the PathScan® apoptosis multi-target sandwich ELISA kit (Cellsignal) following the supplied protocol. Cells in exponential growth phase were seeded in a 6 cm Petri dish at a concentration of  $10 \times 10^5$  cell/dish (5 dishes). The cells were allowed to attach to the wells for 24 h at 37 °C, 5% CO<sub>2</sub>. The culture medium was removed and 5mL medium containing D-1 (immediately diluted from fresh prepared stock solution of 11.2 mM) at concentration of 280 µM was placed into each dish. At 0, 6, 12, 24, 32 h, remove the medium and wash the cells by cold PBS buffer for 3 times. 0.9 mL lysis buffer was used to lyse cells in each dish, and 0.9

mL of diluents buffer was used to dilute each of the cell lysate. The lysate was incubated in the provided 96 well plate at 4 °C for 24 h.

**Table S1.** Conversion and degradation of D-**1** and L-**1**. Composition of the pericellular hydrogel/nanofibrils and the suspension medium of HeLa cells after incubation with D-**1** or L-**1** at 560  $\mu$ M at 37 °C for 12 h.

| Precursor   | Pericellular hydrogel<br>( $\mu$ M) | Suspension medium<br>( $\mu$ M) |                      |
|-------------|-------------------------------------|---------------------------------|----------------------|
| D- <b>1</b> | D- <b>2</b><br>2053.9               | D- <b>2</b><br>502.5            |                      |
| L- <b>1</b> | <sup>a</sup> N/A                    | L- <b>2</b><br>176.6            | L- <b>3</b><br>270.4 |

<sup>a</sup>N/A: no pericellular hydrogel/nanofibrils detected.

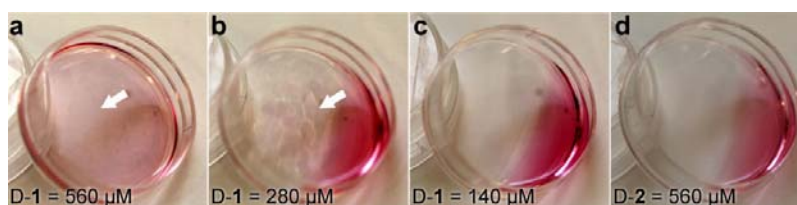

**Figure S1.** Formation of the hydrogel of D-1 in HeLa cell conditioned medium. Optical images of D-1 at a) 560  $\mu$ M of, b) 280  $\mu$ M, c) 140  $\mu$ M, or d) D-2 at 560  $\mu$ M incubated the conditioned medium of HeLa cells for 48 h.

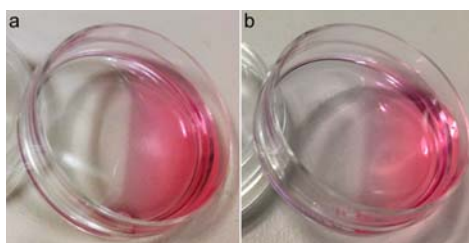

**Figure S2.** High gradient of phosphatases in pericellular space is essential for the formation of pericellular hydrogel. a) Optical images of HeLa cells with 560  $\mu$ M of D-1 and phosphatases inhibitors (Pierce<sup>TM</sup>: sodium fluoride, sodium orthovanadate, sodium pyrophosphate and beta-glycerophosphate) for 2h. b) Optical images of HeLa cells with 560  $\mu$ M of D-1 and ALP (0.1 U/mL) for 2 h.

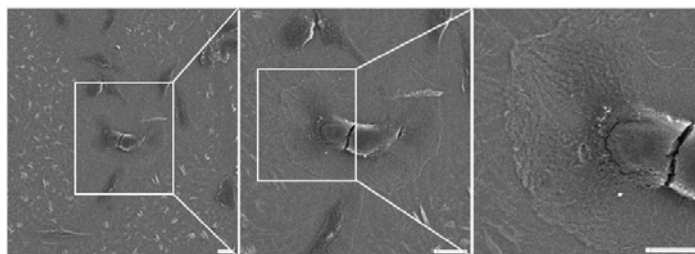

**Figure S3.** SEM images of freeze dried HeLa cells treated with D-1 at 280  $\mu$ M for 2h. Scale bar = 10 mm.

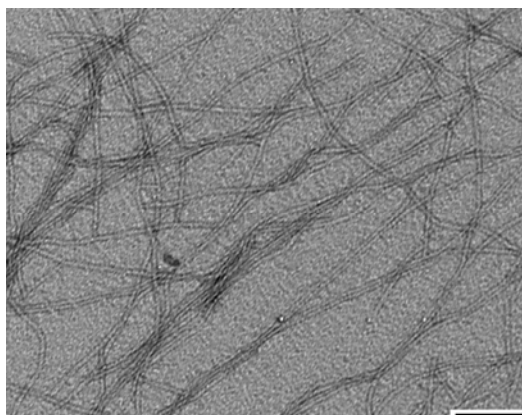

**Figure S4.** TEM image of hydrogel formed by ALP induced enzymatic gelation of D-1 in PBS buffer. The hydrogel was formed by incubating 0.6 U/mL of ALP with D-1 at 0.2 wt% for 6 h. Scale bar = 100nm.

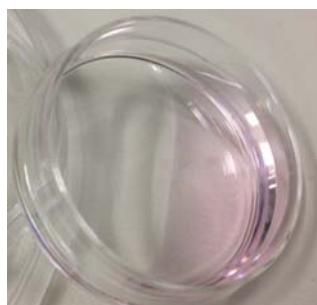

**Figure S5.** Optical image of Ect1/E6E7 cells incubated with D-1 at 560  $\mu$ M for 48h.

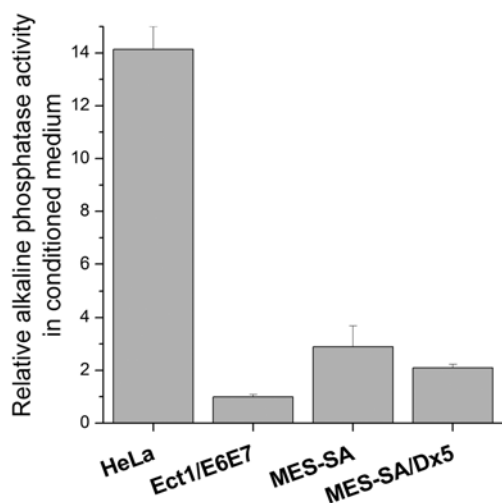

**Figure S6.** Relative activities of phosphatases in the conditioned media of HeLa, Ect1/E6E7, MES-SA and MES-SA/Dx5 cells.

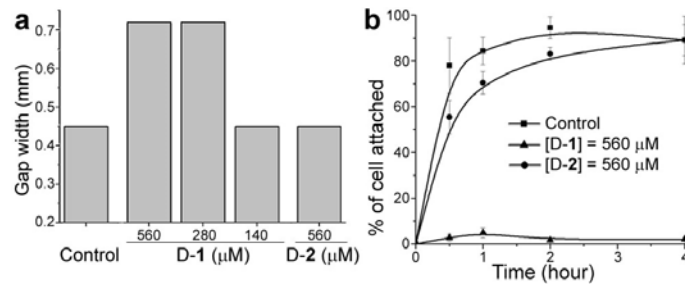

**Figure S7.** Inhibitory effect of D-1 to HeLa cells. a) Migration of the HeLa cells after incubation with D-1 or D-2, or just the culture medium as the control for 18 h. Original gap with width = 0.90 mm. b) The plot of time versus the percentage of cell attached to Petri dish after suspended HeLa cells being incubated with 560  $\mu\text{M}$  of D-1 or D-2, or just culture medium as control.

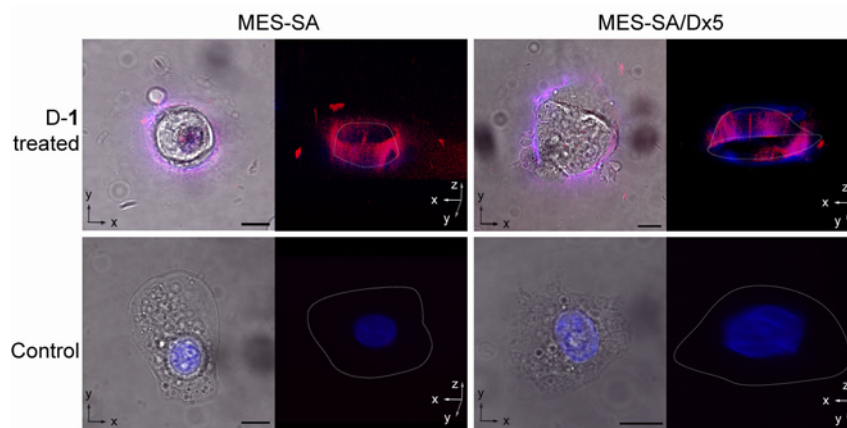

**Figure S8.** Overlaid images and 3D stacked z-scan images of Congo red and DAPI stained MES-SA and MES-SA/Dx5 treated by D-1 at 280  $\mu\text{M}$  or just medium as control for 12 h. Scale bar = 10  $\mu\text{m}$ . White dots outline the cells.

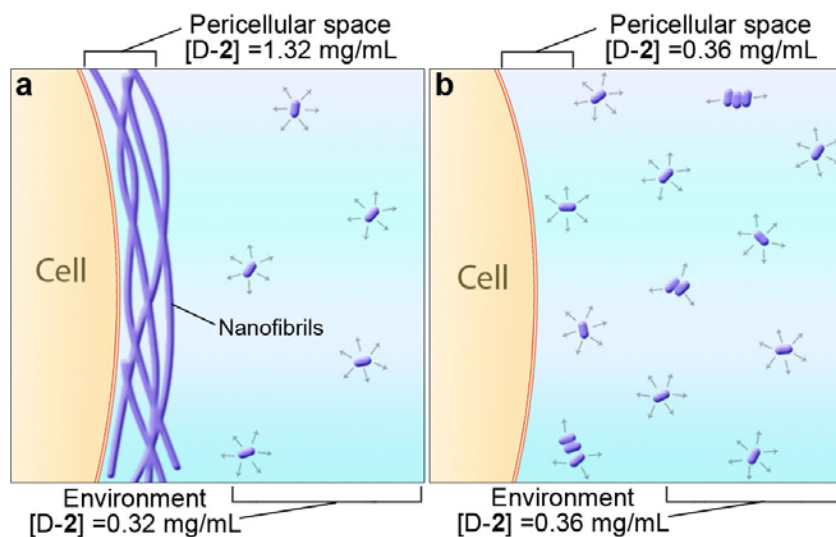

**Figure S9.** Distribution of D-2 around the cells. a) Distribution of D-2 around the HeLa cells due to pericellular dephosphorylation of D-1. b) Distribution of D-2 around the HeLa cells via direct addition of D-2. The gray arrows indicate the direction of motion of the D-2 molecules.

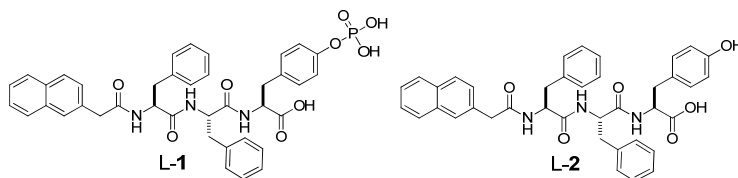

**Figure S10.** Chemical structures of L-1 and L-2, the enantiomers of D-1 and D-2.

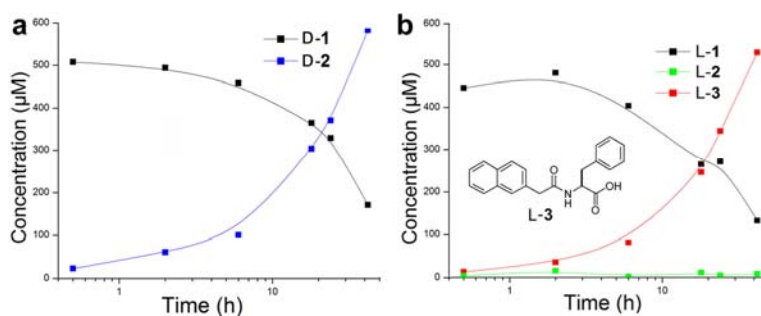

**Figure S11.** Formation of pericellular hydrogel/nanofibrils is dependent to the bio-stability of the molecules. a) Time dependent conversion curve of D-1 by complete culture medium containing secretory enzymes from HeLa cells. b) Time dependent degradation curve of L-1 by complete culture medium containing secretory enzymes from HeLa cells.



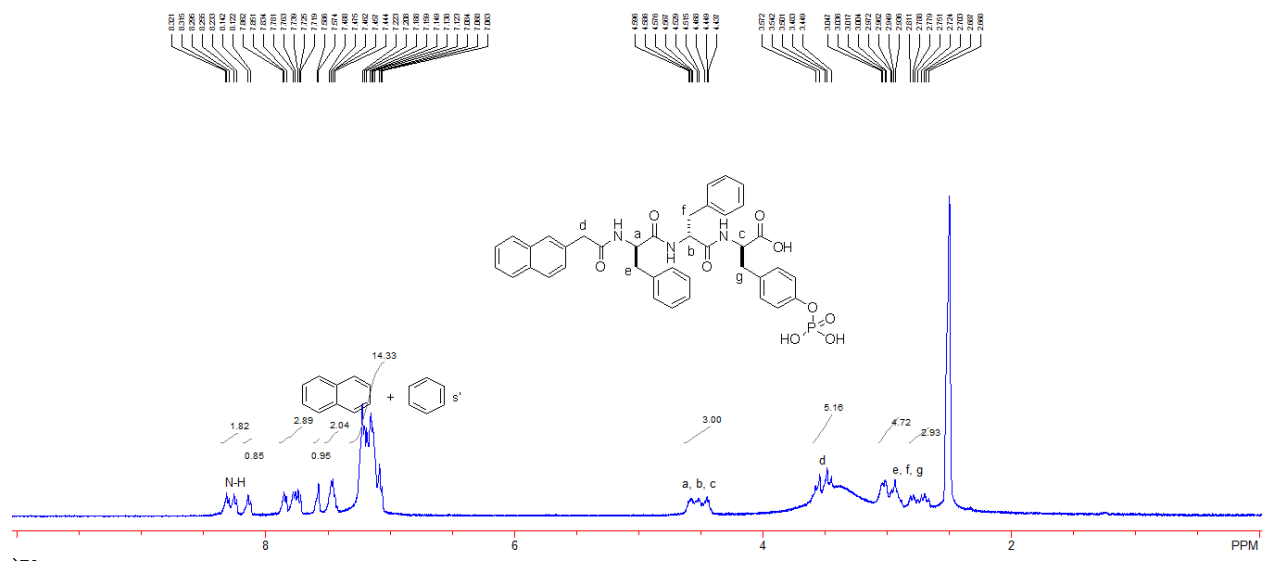

<sup>1</sup>H NMR of D-1

**Figure S13.** <sup>1</sup>H NMR of L-1 and D-1.
